# Supplementary material for: CYP2J2/EET reduces vulnerability to atrial fibrillation in chronic pressure overload mice
Source: PubMed Central journal article supplement (PMC6933320; doi:10.1111/jcmm.14796), 2019-11-20
Supplement: JCMM-24-862-s001.pdf [file JCMM-24-862-s001.pdf]

Figure S1

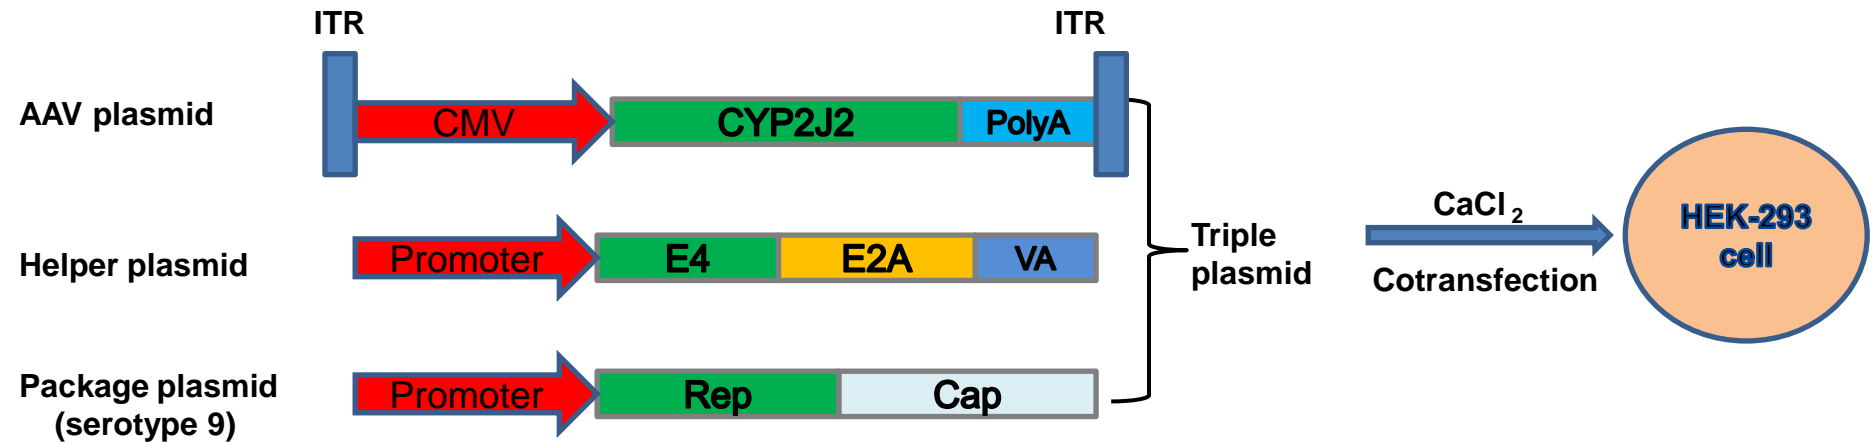

**Figure S1:** Production of recombinant adeno-associated virus 9: The rAAV-CYP2J2 and rAAV-GFP vector plasmids were constructed by inserting the human CYP2J2 cDNA and GFP cDNA into the AAV vector driven by the cytomegalovirus promoter at BamH I and Not I sites, respectively. The vectors for rAAV-CYP2J2 and rAAV-GFP were prepared using a triple plasmid cotransfection method in 293 cell lines. Human 293 cells were grown in Dulbecco's modified Eagle medium (DMEM) supplemented with 10% fetal bovine serum (FBS) and antibiotics in a 5% CO<sub>2</sub> atmosphere at 37°C. Immediately before transfection, each 15-cm-diameter plate of the cells (70-80% confluent) was fed with 15 ml of fresh DMEM containing 10% fetal bovine serum. A total of 50 µg plasmid DNA per 15 cm plate (AAV-CYP2J2 or AAV-GFP vector plasmids/package plasmid /helper plasmid were 1:1:1 molar ratios) was dissolved in 1 ml of 0.25 M CaCl<sub>2</sub> and then quickly mixed with 1 ml of HEPES-buffered saline (50 mM HEPES, 280 mM NaCl, 1.5 mM Na<sub>2</sub>HPO<sub>4</sub> (PH 7.1-7.2) and added to the cells. At 8-12 h after transfection, the medium was replaced with fresh DMEM containing 10% FBS. The cells were harvested at 48-72 h post transfection. After low-speed centrifugation on a tabletop centrifuge, the cell pellets were resuspended in 100 mM NaCl, 10 mM Tris-HCl (pH 8.0) and subjected to three cycles of freeze-thaw, and cell debris was removed by centrifugation. AAV vectors were purified with CsCl density gradient purification. The eluted rAAV was aliquoted and stored at -80 °C.

Figure S2

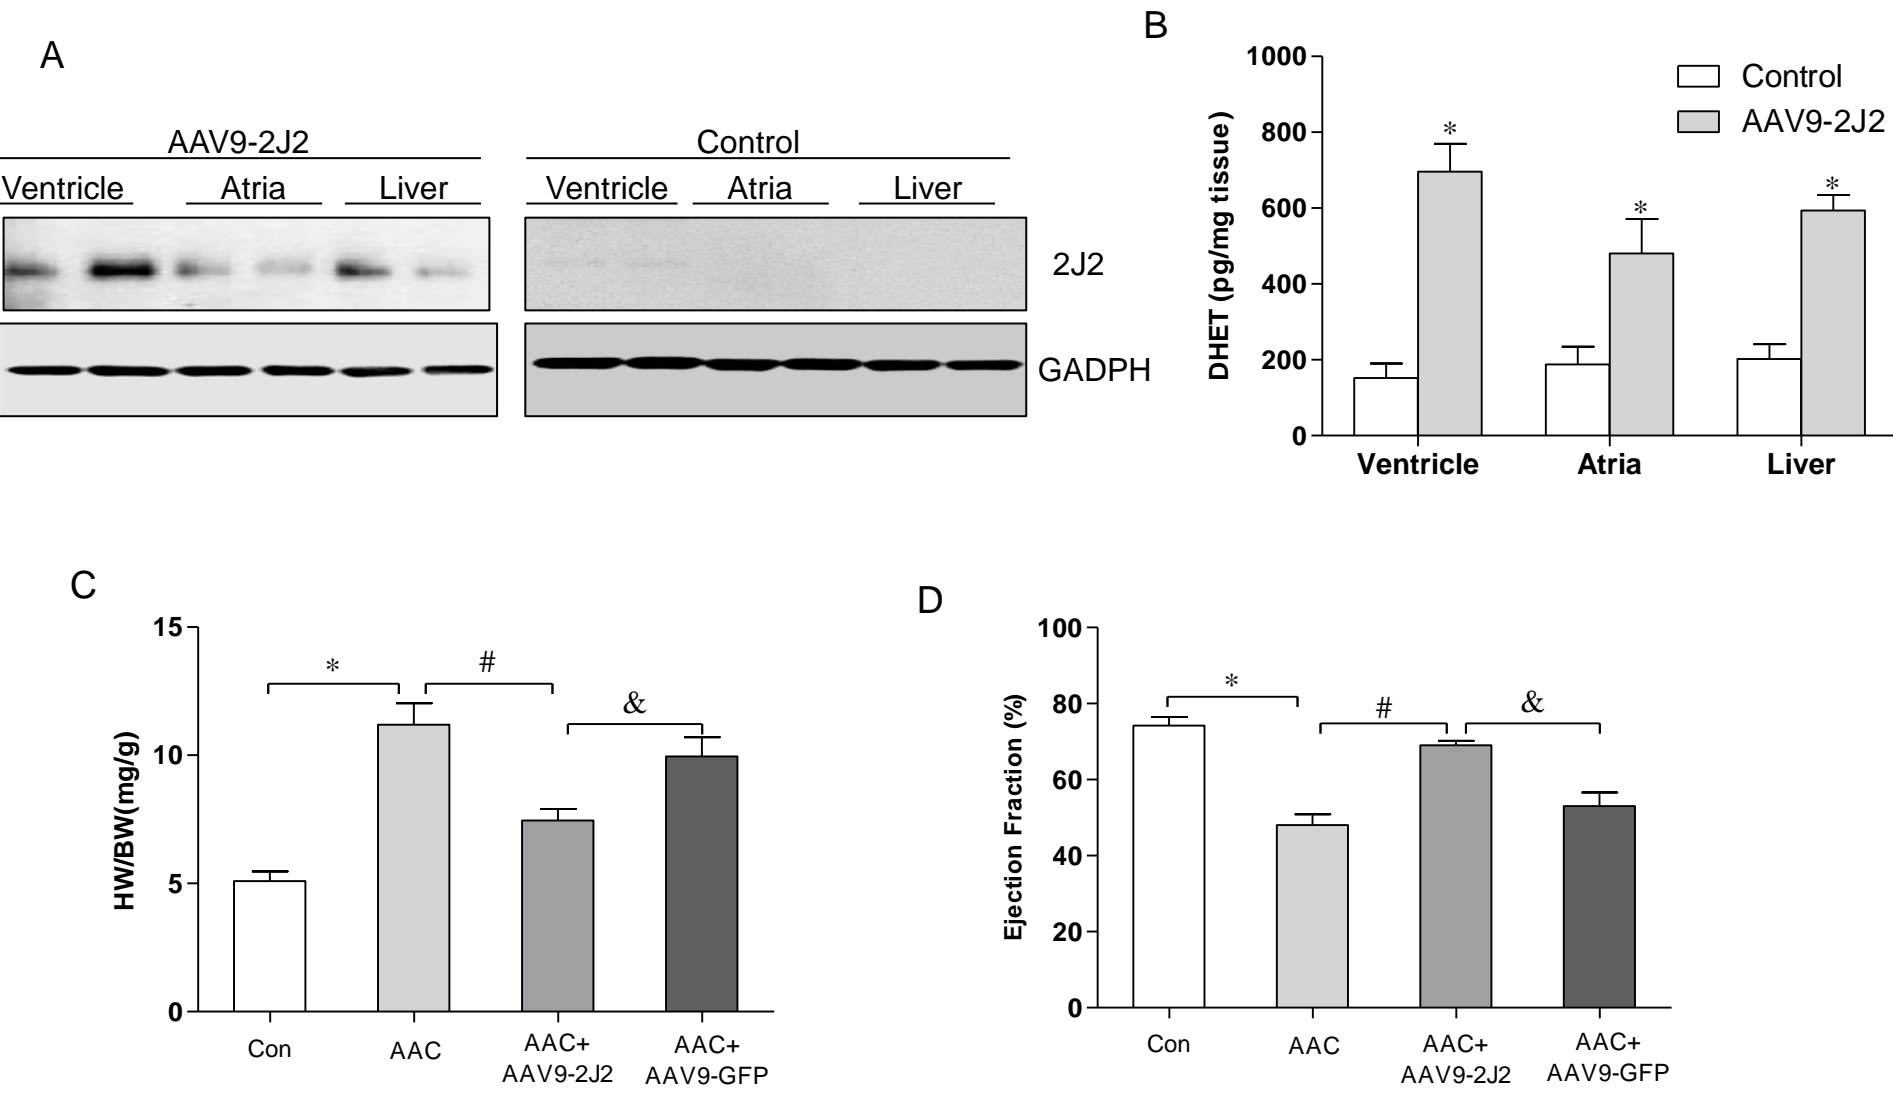

**FigureS2:** (A) Representative Western blots depicting expression of CYP2J2 in atria, ventricle and liver of mice with or without AAV9-2J2; (B) Analyses of DHET level in ventricle, atria and liver of mice with or without AAV9-2J2; (C) Analyses of heart weight/body weight ratio (HW/BW) in mice; (D) Analyses of ejection fraction (EF). \*:  $p < 0.05$ , compare with control group; #:  $p < 0.05$ , compare with AAC group; &:  $p < 0.05$ , compare with AAC+CYP2J2 group.
